# Supplementary material
Source: PubMed Central journal article supplement (PMC5728098)

# SUPPLEMENTAL DATA

## Figures S1. CONSORT Flowchart

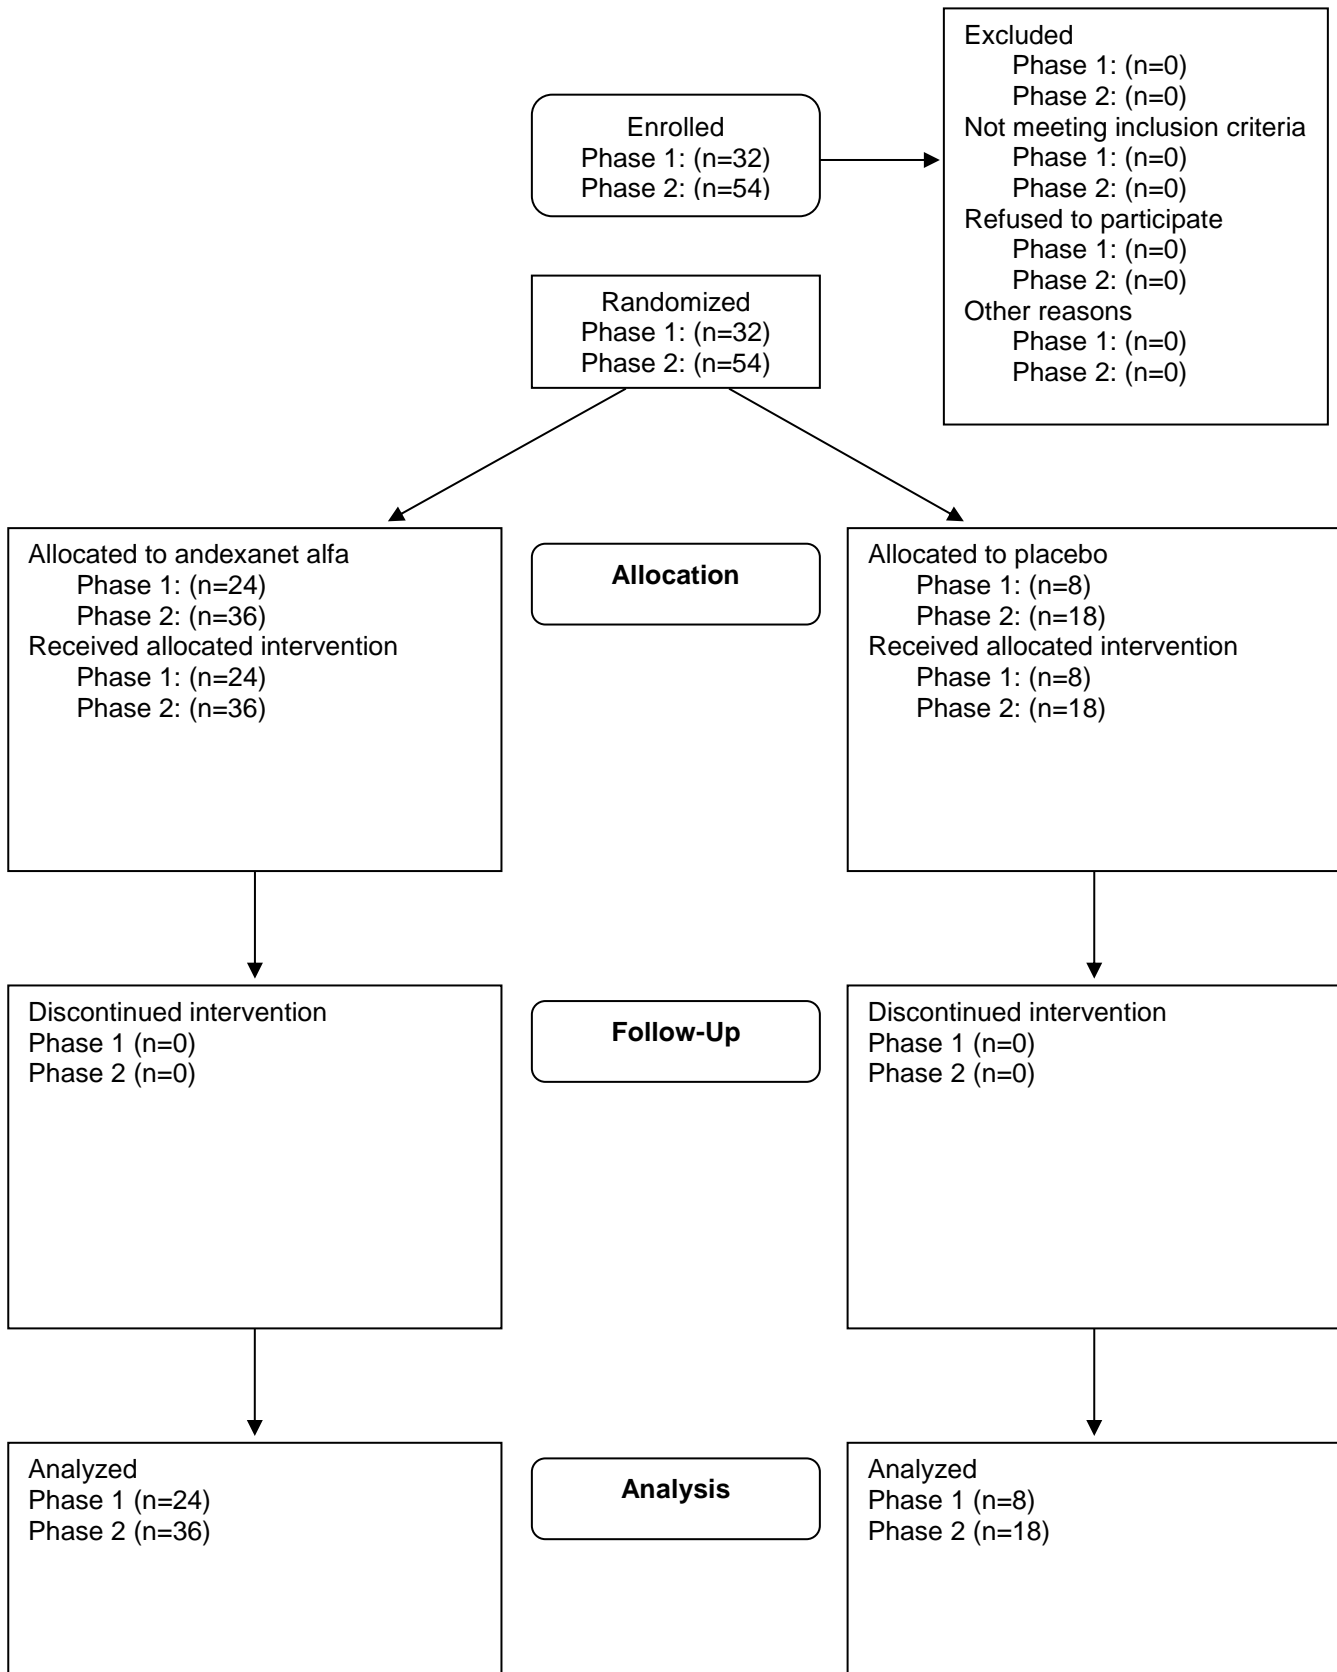

**Table S1: Unbound and Total Concentration of Apixaban after Andexanet Administration**

| Pharmacokinetic Parameters<br>(Mean ± SD)                  | Andexanet Dose, Mean ± SD (n=6/Cohort) |                               |                               |                                 |                       |                            | Placebo*<br>(n=18)       |
|------------------------------------------------------------|----------------------------------------|-------------------------------|-------------------------------|---------------------------------|-----------------------|----------------------------|--------------------------|
|                                                            | 90 mg bolus<br>(cohort 1)              | 210 mg<br>bolus<br>(cohort 2) | 420 mg<br>bolus<br>(cohort 3) | 420/4 x 45<br>min<br>(cohort 4) | 420/180<br>(cohort 5) | 420/4 x 2 hr<br>(cohort 6) |                          |
| Unbound Apixaban<br>C <sub>3.03</sub> <sup>a</sup> (ng/mL) | 3.83 ± 1.17                            | 4.53 ± 2.61                   | 2.25 ± 0.918                  | 1.88 ± 0.21                     | 1.10 ± 0.11           | 1.17 ± 0.31                | 8.37 ± 1.43 <sup>b</sup> |
| Total Apixaban<br>C <sub>3.02</sub> <sup>a</sup> (ng/mL)   | 176 ± 24.1                             | 286 ± 76.0                    | 326 ± 60.4                    | 398 ± 54.9                      | 439 ± 48.8            | 361 ± 44.1                 | 133 ± 19.2 <sup>b</sup>  |

SD, standard deviation

\*Pooled placebo group from Cohorts 1 through 6

<sup>a</sup>Plasma concentration measured 2 minutes after the end of first andexanet first bolus dose

<sup>b</sup>Mean ± SD data from C<sub>3.02</sub> and C<sub>3.03</sub>

**Table S2: Pharmacodynamic Parameters for Andexanet and Apixaban on Day 6.**

ACT, activated coagulation time; aPTT, activated partial thromboplastin time; h, hour; m, minute; PTT, partial thrombin time; SD, standard deviation; sec, second;

| Assessment, mean (SD)        | 90mg bolus<br>n=6 | 210mg<br>bolus<br>n=6 | 420mg bolus<br>n=6 | 420mg<br>+ 180mg<br>infusion<br>n=6 | 420mg<br>+ 180mg<br>bolus<br>n=6 | 420mg<br>+ 480mg<br>infusion<br>n=6 | All active<br>n=36 | Vehicle<br>control<br>n=18 |
|------------------------------|-------------------|-----------------------|--------------------|-------------------------------------|----------------------------------|-------------------------------------|--------------------|----------------------------|
| <b>ACT, sec<sup>a</sup></b>  |                   |                       |                    |                                     |                                  |                                     |                    |                            |
| Pre-Apixaban                 | 144 (34.9)        | 131 (8.9)             | 133 (7.2)          | 130 (7.0)                           | 133 (6.6)                        | 148 (18.9)                          | 136 (17.6)         | 132 (13.8)                 |
| Post-Apixaban (3 h)          | 148 (11.5)        | 152 (11.0)            | 149 (5.4)          | 151 (8.2)                           | 151 (14.6)                       | 164 (14.9)                          | 153 (11.9)         | 158 (18.2)                 |
| Pre-Andexanet (0-2 m)        | 130 (10.8)        | 122 (9.7)             | 113 (9.1)          | 112 (13.9)                          | 116 (6.4)                        | 112 (11.1)                          | 117 (11.8)         | 152 (13.7)                 |
| Post-Andexanet (15 m)        | 128 (9.5)         | 123 (9.2)             | 119 (5.7)          | 109 (8.5)                           | NR                               | 112 (9.7)                           | 118 (10.6)         | 152 (10.6)                 |
| <b>aPTT, sec<sup>b</sup></b> |                   |                       |                    |                                     |                                  |                                     |                    |                            |
| Pre-Apixaban                 | 29.8 (2.04)       | 30.2 (1.72)           | 29.5 (1.87)        | 31.3 (2.07)                         | 29.5 (1.52)                      | 31.2 (0.75)                         | 30.3 (1.76)        | 29.6 (1.65)                |
| Post-Apixaban (3 h)          | 31.2 (1.72)       | 31.5 (1.87)           | 30.8 (1.60)        | 32.2 (3.31)                         | 30.3 (1.63)                      | 32.3 (0.82)                         | 31.4 (1.96)        | 30.4 (2.17)                |
| Pre-Andexanet (0-2 m)        | 30.2 (2.14)       | 31.2 (0.98)           | 30.5 (2.66)        | 31.8 (1.60)                         | 29.7 (2.16)                      | 31.3 (0.82)                         | 30.8 (1.87)        | 29.5 (2.50)                |
| Post-Andexanet (15 m)        | 29.5 (1.64)       | 30.5 (1.38)           | 30.5 (1.64)        | 30.8 (1.72)                         | NR                               | 31.3 (1.37)                         | 30.5 (1.57)        | 30.1 (1.75)                |
| <b>PTT, sec<sup>c</sup></b>  |                   |                       |                    |                                     |                                  |                                     |                    |                            |
| Pre-Apixaban                 | 11.2 (0.39)       | 11.0 (0.41)           | 11.0 (0.33)        | 10.9 (0.25)                         | 11.1 (0.31)                      | 11.1 (0.49)                         | 11.1 (0.36)        | 11.1 (0.42)                |
| Post-Apixaban (3 h)          | 11.6 (0.44)       | 11.4 (0.30)           | 11.2 (0.27)        | 11.3 (0.39)                         | 11.7 (0.45)                      | 11.3 (0.54)                         | 11.4 (0.41)        | 11.4 (0.39)                |
| Pre-Andexanet (0-2 m)        | 11.4 (0.51)       | 11.2 (0.28)           | 11.1 (0.35)        | 11.0 (0.33)                         | 11.2 (0.41)                      | 11.1 (0.47)                         | 11.2 (0.39)        | 11.5 (0.45)                |
| Post-Andexanet (15 m)        | 12.1 (1.47)       | 11.2 (0.26)           | 11.0 (0.21)        | 10.9 (0.36)                         | NR                               | 11.0 (0.47)                         | 11.2 (0.82)        | 11.4 (0.37)                |

NR, not reported.

Apixaban 5mg po.

<sup>a</sup>Ref range 90-150.

<sup>b</sup>Ref range 23-32.

<sup>c</sup>Ref range 9.6-11.6.

Figure S2. Dosing and Treatment Regimen for the Phase 2 Trial.

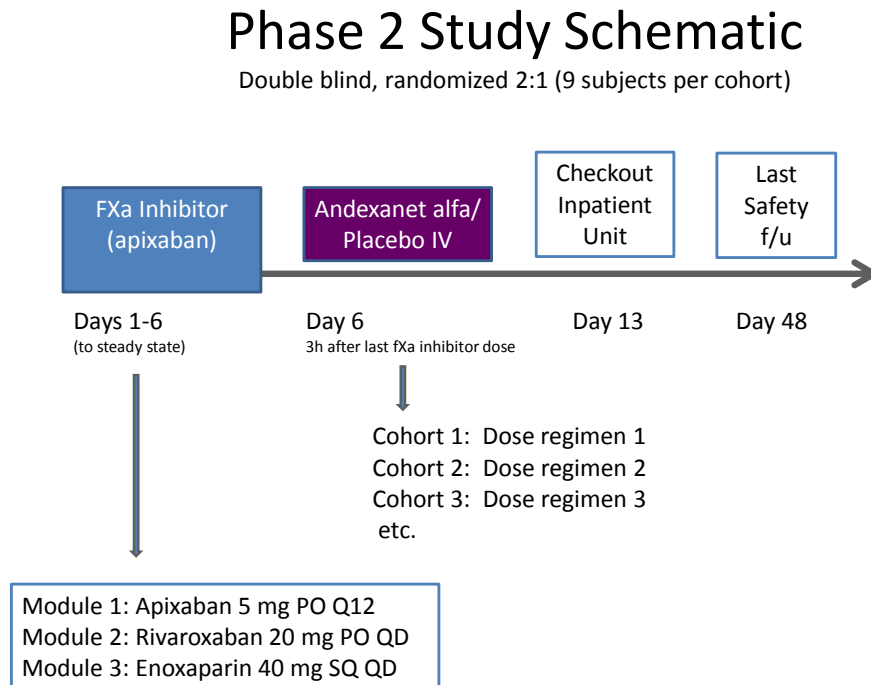

Supplement: ba007112-suppl1.pdf [file ba007112-suppl1.pdf]
